# Supplementary material for: Development of a biomimetic sensor for selective identification of cyanide
Source: Royal Society of Chemistry journal article supplement (doi:10.1039/c6ay01830k), 2016-01-01
Supplement: c6ay01830k1.pdf [file c6ay01830k1.pdf]

## ELECTRONIC SUPPLEMENTARY MATERIAL (ESI)

### Development of biomimetic sensor for selective identification of cyanide

E.C. Figueira, L.C.S. Neres, M.R.S. Ruy, G.F. Troiano and M.D.P.T. Sotomayor\*.

#### S1. Voltammetric responses to eight different ions used the proposed sensor.

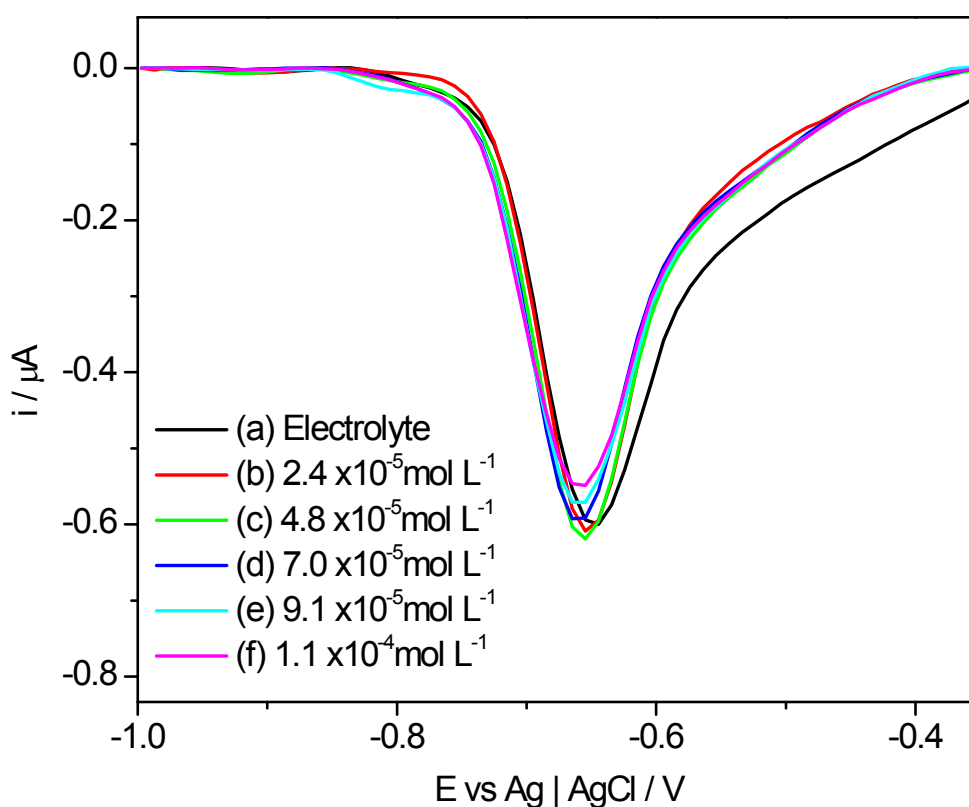

**Figure S1:** Results obtained to evaluate the interference of the sodium and acetate in the sensor response. Measurements were conducted with a supporting electrolyte of NaOH (pH 12.0), amplitude: 10 mV, frequency: 20 Hz and step potential: 10 mV. The concentrations corresponding to successive addition of sodium acetate.

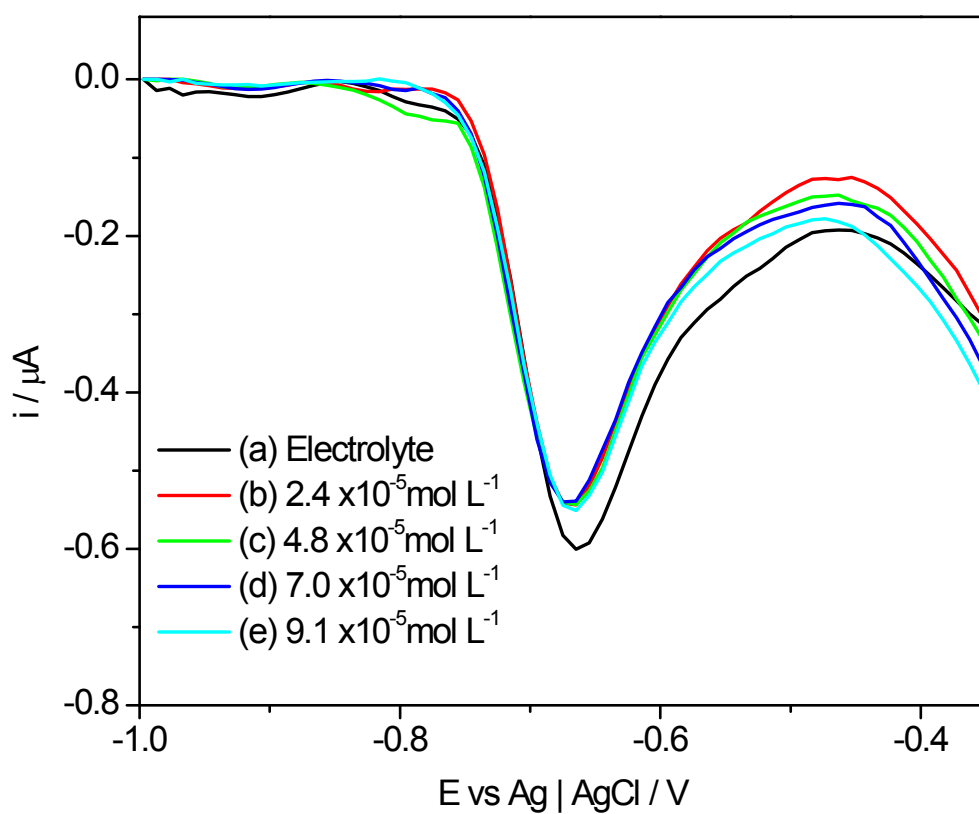

**Figure S2:** Results obtained to evaluate the interference of the borate in the sensor response. Measurements were conducted with a supporting electrolyte of NaOH (pH 12.0), amplitude: 10 mV, frequency: 20 Hz and step potential: 10 mV. The concentrations corresponding to successive addition of sodium borate.

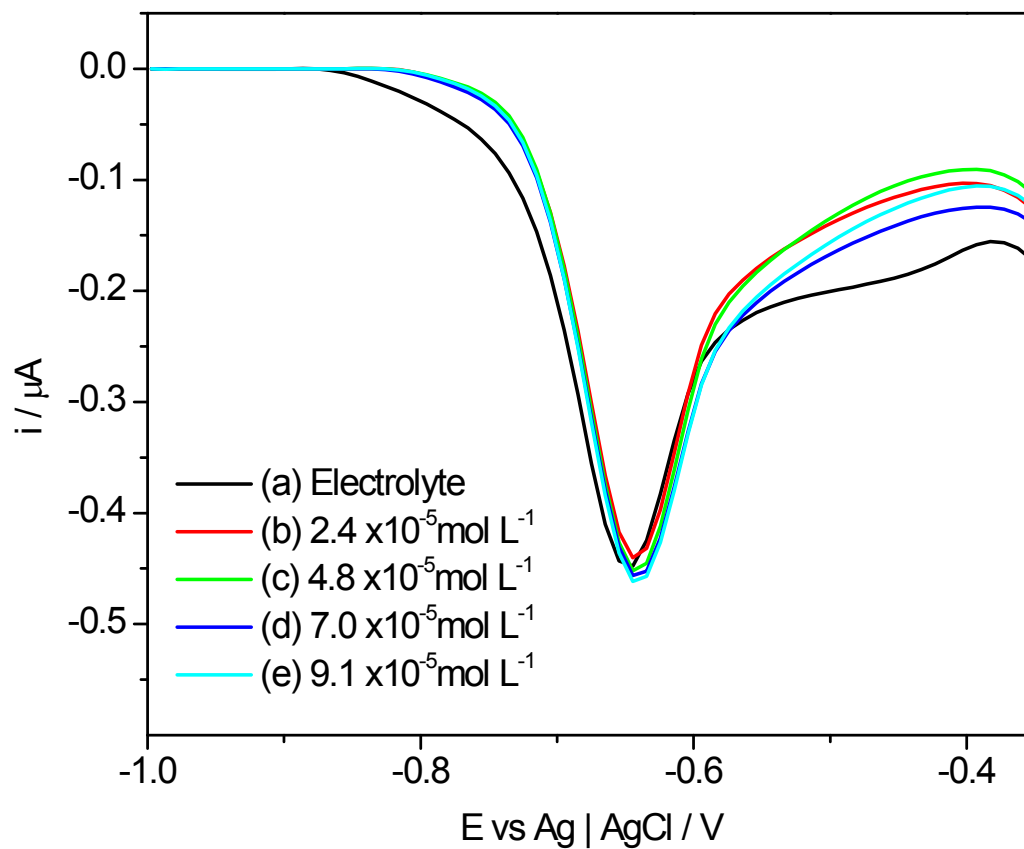

**Figure S3:** Results obtained to evaluate the interference of the  $\text{Ca}^{2+}$  and  $\text{Cl}^-$  in the sensor response. Measurements were conducted with a supporting electrolyte of NaOH (pH 12.0), amplitude: 10 mV, frequency: 20 Hz and step potential: 10 mV. The concentrations corresponding to successive addition of calcium chloride.

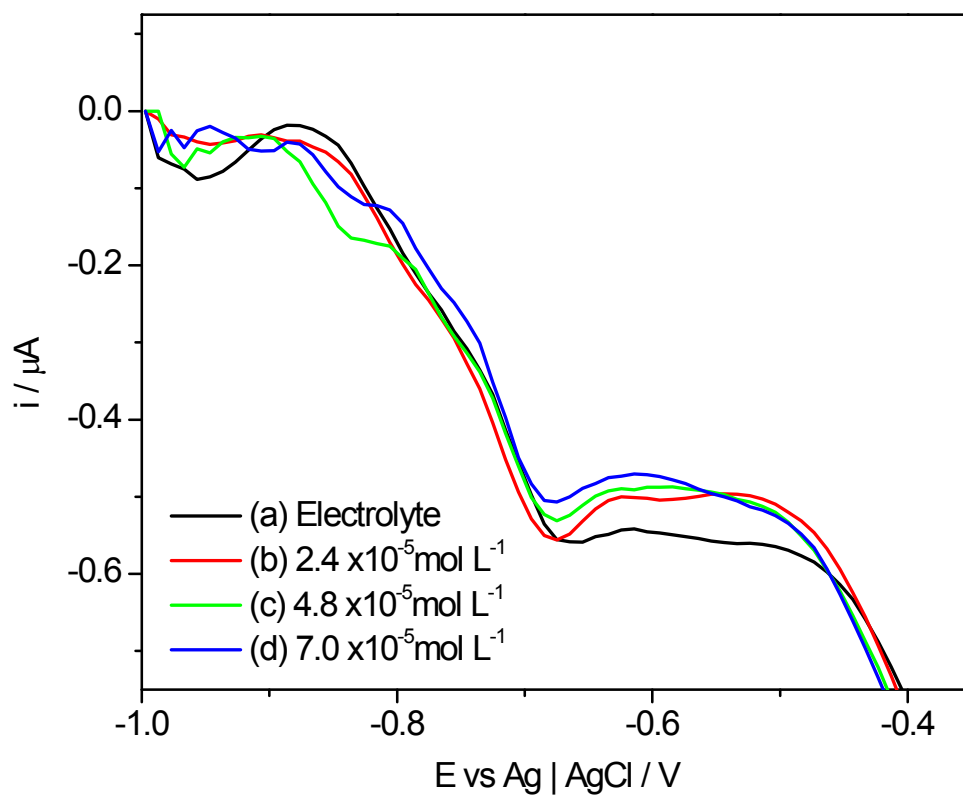

**Figure S4:** Results obtained to evaluate the interference of the  $\text{Pb}^{2+}$  and  $\text{NO}_3^-$  in the sensor response. Measurements were conducted with a supporting electrolyte of  $\text{NaOH}$  ( $\text{pH}$  12.0), amplitude: 10 mV, frequency: 20 Hz and step potential: 10 mV. The concentrations corresponding to successive addition of calcium chloride.

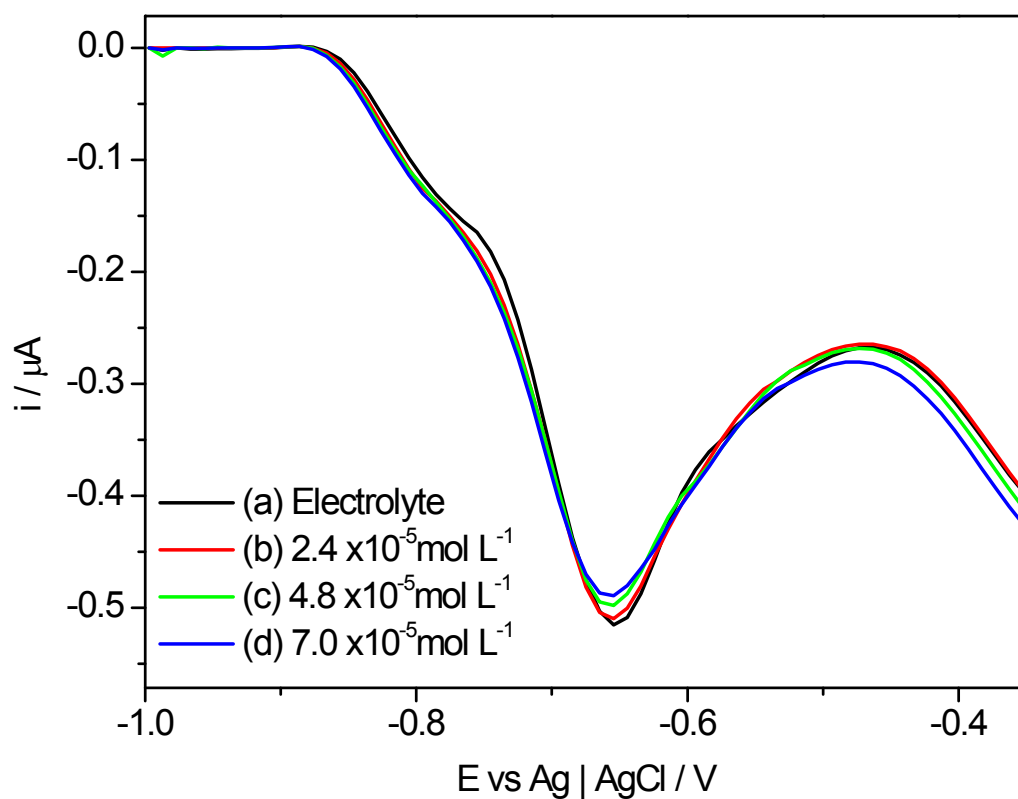

**Figure S5:** Results obtained to evaluate the interference of the  $\text{NH}_4^+$  and  $\text{MoO}_4^{2-}$  in the sensor response. Measurements were conducted with a supporting electrolyte of NaOH (pH 12.0), amplitude: 10 mV, frequency: 20 Hz and step potential: 10 mV. The concentrations corresponding to successive addition of calcium chloride.
